# Supplementary material
Source: Royal Society of Chemistry journal article supplement (doi:10.1039/d6nr01037g)
Supplement: d6nr01037g1.pdf [file d6nr01037g1.pdf]

Supporting Information

# **Decay-Length-Guided Electrode Spacing for Wide-Linear-Dynamic-Range CsPbBr<sub>3</sub> Nanowire Photodetectors**

Shuai Yang,<sup>† a</sup> Weili Liu,<sup>† a</sup> Han Bao,<sup>a</sup> Jialin Wang,<sup>a</sup> Jiao Xu,<sup>\* a</sup> Hongwei Liang,<sup>a</sup> and  
Yiming Yang,<sup>a</sup>

<sup>a</sup>School of Integrated Circuits, Dalian University of Technology, Dalian, 116620,  
China

\*Corresponding author E-mail: [xujiao@dlut.edu.cn](mailto:xujiao@dlut.edu.cn);

<sup>†</sup>These authors contributed equally to this work.

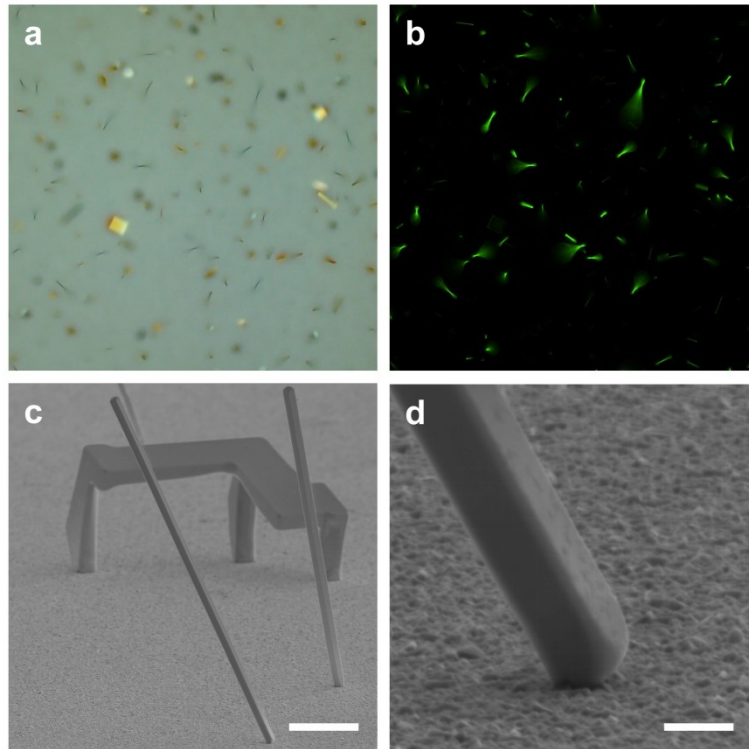

**Figure S1.** (a) Optical microscopy image of CsPbBr<sub>3</sub> NWs grown on an FTO substrate with a tilted configuration. (b) Corresponding fluorescence microscopy image of the NWs on FTO. (c) SEM image showing the tilted growth of the NWs on the FTO substrate. Scale bar: 10  $\mu\text{m}$ . (d) Enlarged SEM image of the tilted NW, highlighting the intimate contact between one end of the NW and the FTO substrate. Scale bar: 1  $\mu\text{m}$ .

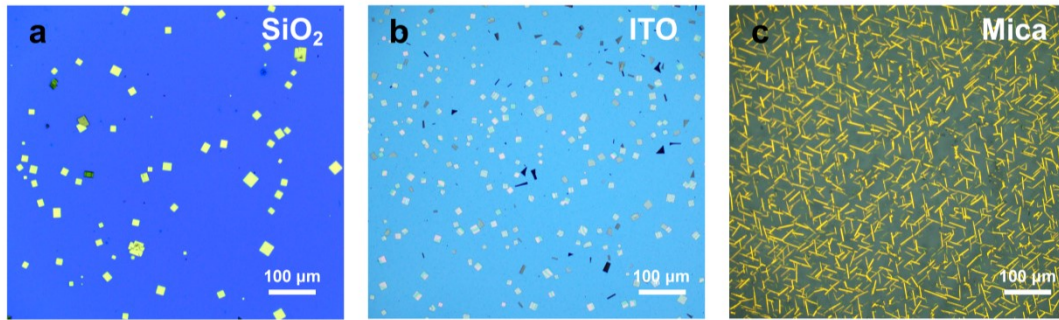

**Figure S2.** Growth of CsPbBr<sub>3</sub> single crystals on SiO<sub>2</sub>/Si, ITO, and mica substrates by CVD.

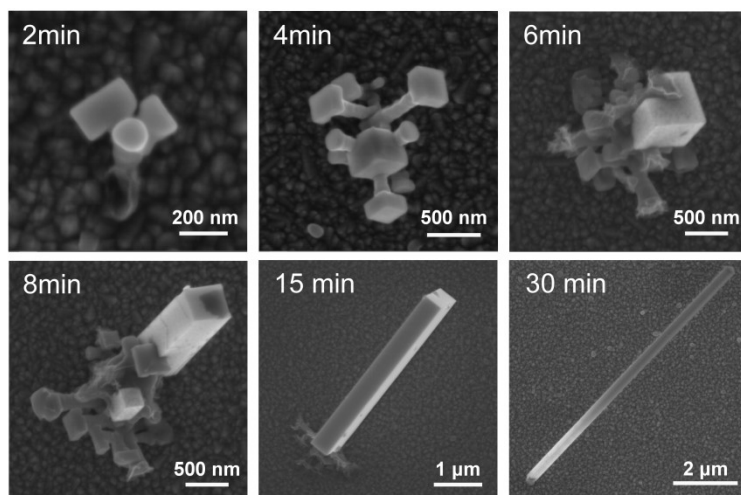

**Figure S3.** Time-dependent SEM images of CsPbBr<sub>3</sub> NWs grown by CVD, showing the evolution of morphology and size with increasing growth time.

### Synthesis of CsPbBr<sub>3</sub> NWs by solution method:

CsPbBr<sub>3</sub> NWs were synthesized via an anti-solvent-assisted method. PbBr<sub>2</sub> and CsBr with a molar ratio of 1:1 were dissolved in DMF to obtain a 0.05 M precursor solution. The mixture was magnetically stirred at 25 °C for 4 h until a clear solution was obtained, and then filtered through a 0.22 μm nylon 66 membrane. Subsequently, 10 μL of the precursor solution was deposited onto a cleaned FTO glass substrate. The substrate was then transferred into a sealed beaker containing a small amount of isopropanol, which served as the anti-solvent. After standing for several hours, CsPbBr<sub>3</sub> NWs were formed on the FTO substrate.

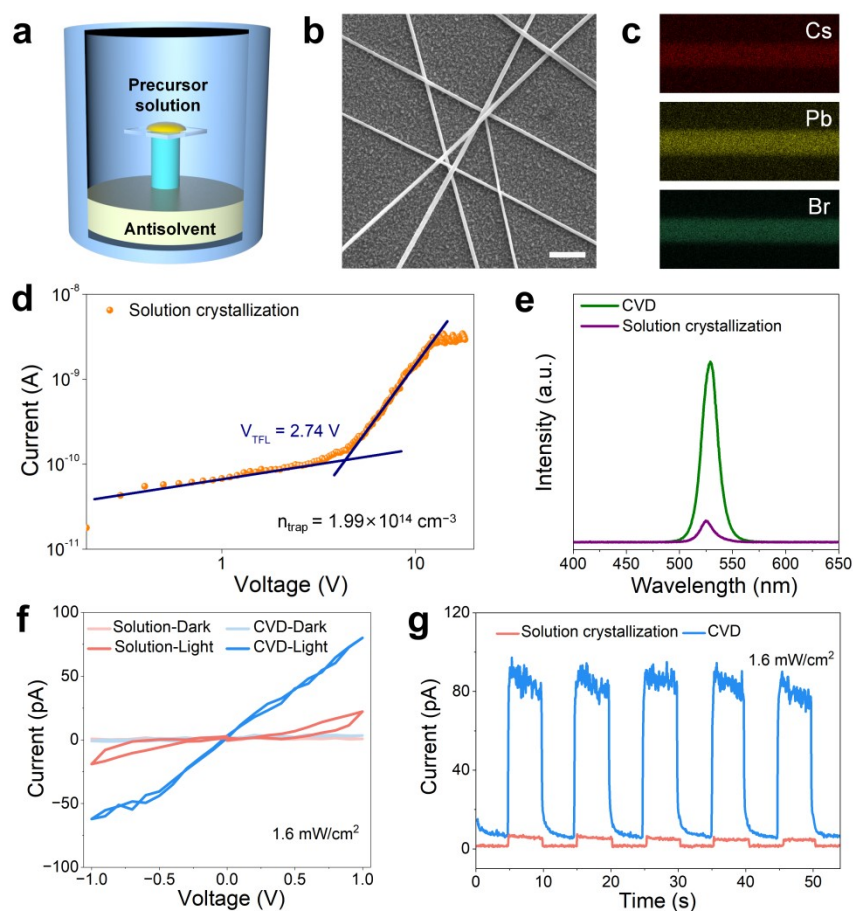

**Figure S4.** (a) Schematic drawing of the solution synthesis setup for NW growth. (b) SEM image of NWs on FTO substrate. Scale bar: 3 μm. (c) EDS of Cs, Pb, and Br along a NW. (d) Space charge limited current characteristics for a NW. (e-g) Comparison of PL and photoresponse properties of NWs synthesized by the solution method and the CVD method.

### CsPbBr<sub>3</sub> NW field-effect transistor measurements:

Transfer-characteristic measurements were conducted using the highly doped Si substrate as the global back gate and 300 nm SiO<sub>2</sub> as the gate dielectric. The measurement was carried out at 80 K to suppress ion migration in the perovskite nanowire and thus obtain a more reliable gate-modulated electronic transport response. The transfer curve confirms p-type behavior of the CsPbBr<sub>3</sub> nanowire, indicating that holes are the majority carriers and photogenerated electrons are the minority carriers. The hole concentration of the CsPbBr<sub>3</sub> nanowire and the depletion width of the Schottky-contact can then be estimated. The NW is approximated using a cylinder-on-plane model with an effective radius, the gate capacitance per unit length is<sup>1</sup>:

$$\hat{C}_g = \frac{2\pi\epsilon_0\epsilon_{ox}}{\cosh^{-1}\left(\frac{t_{ox} + r}{r}\right)}$$

where  $\epsilon_0$  is the vacuum permittivity,  $\epsilon_{ox}$  is the relative dielectric constant of SiO<sub>2</sub>, the  $t_{ox}$  is the thickness of the SiO<sub>2</sub> layer, the  $r$  is the effective radius. The capacitances per unit length obtained from the cylinder-on-plane model is 0.155 nF/m. The effective hole concentration can then be estimated from the gate-induced charge needed to deplete the NW:

$$p_{eff} = \frac{\hat{C}_g |V_{th}|}{qA}$$

where  $q$  is the elementary charge,  $V_{th}$  is the effective threshold depletion voltage, From the transfer curve, the effective threshold/depletion voltage is estimated to be approximately -22 V. and  $A$  is the cross-sectional area of the NW. The  $p_{eff}$  is  $\sim 7.8 \times 10^{16} \text{ cm}^{-3}$ . The depletion width near the Au/CsPbBr<sub>3</sub> Schottky contact was estimated using the depletion approximation<sup>2</sup>:

$$W = \sqrt{\frac{2\epsilon\epsilon_0(V_{dep})}{qp_{eff}}}$$

where  $\epsilon$  is the relative dielectric constant,  $V_{dep}$  is the effective potential drop across the Schottky depletion region. For  $V_{dep}$  from 0.1 to 0.5 V,  $W$  is estimated to increase from approximately 48 nm to 108 nm.

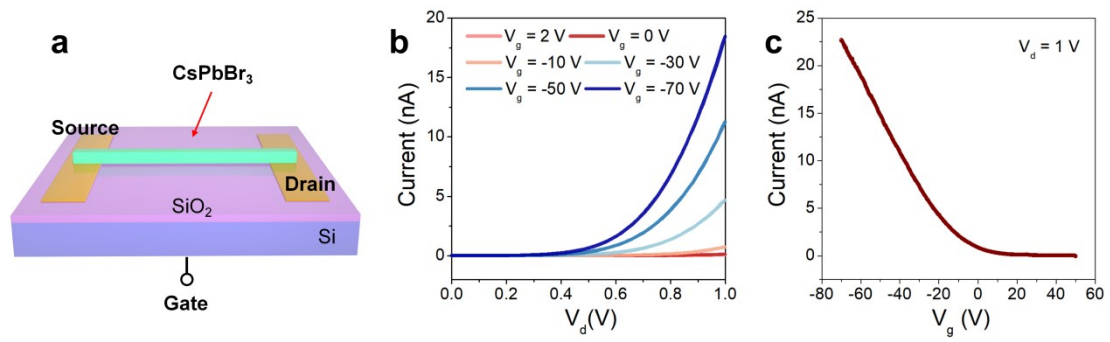

**Figure S5. (a)** Schematic illustration of a CsPbBr<sub>3</sub> NW FET. **(b)** Output characteristic curves. **(c)** Transfer characteristic curve.

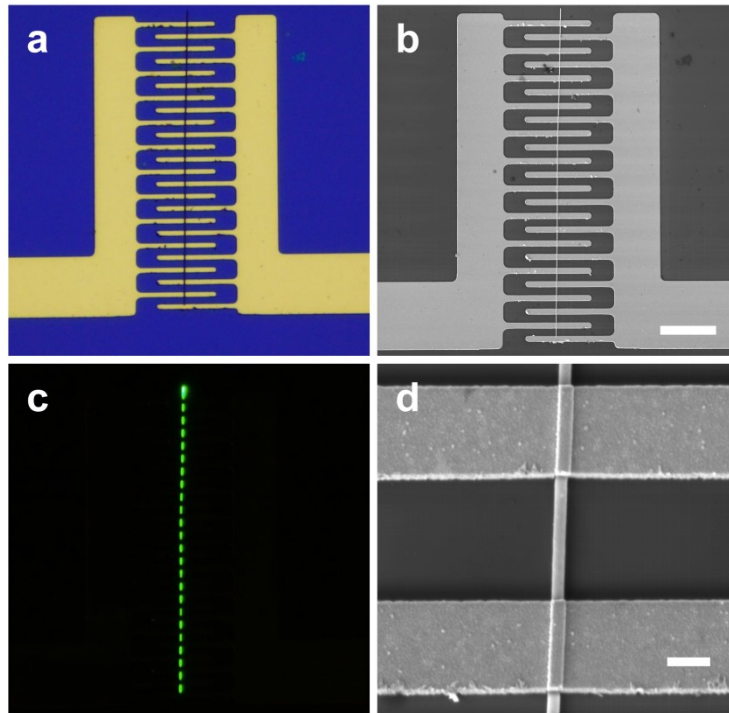

**Figure S6.** (a) Optical microscopy image of the CsPbBr<sub>3</sub> PD with interdigitated electrodes. (b) SEM image of the CsPbBr<sub>3</sub> PD. Scale bar: 20 μm. (c) Fluorescence microscopy image of the CsPbBr<sub>3</sub> PD. (d) Enlarged SEM image of the region in (b). Scale bar: 1 μm.

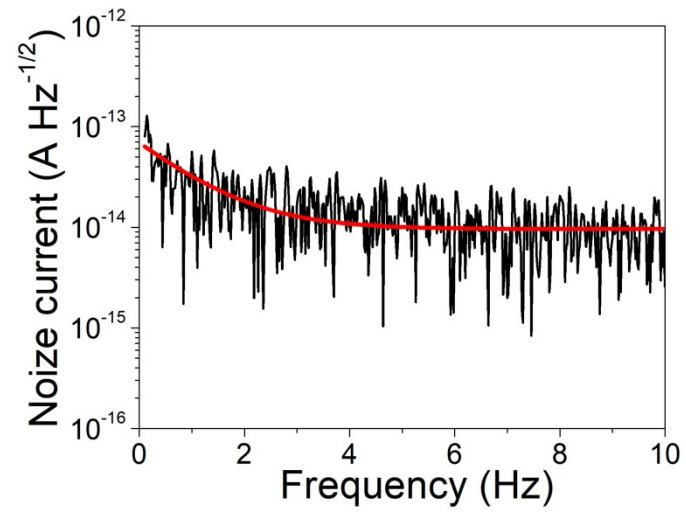

**Figure S7.** The measured total noise current from 0.1 to 10 Hz.

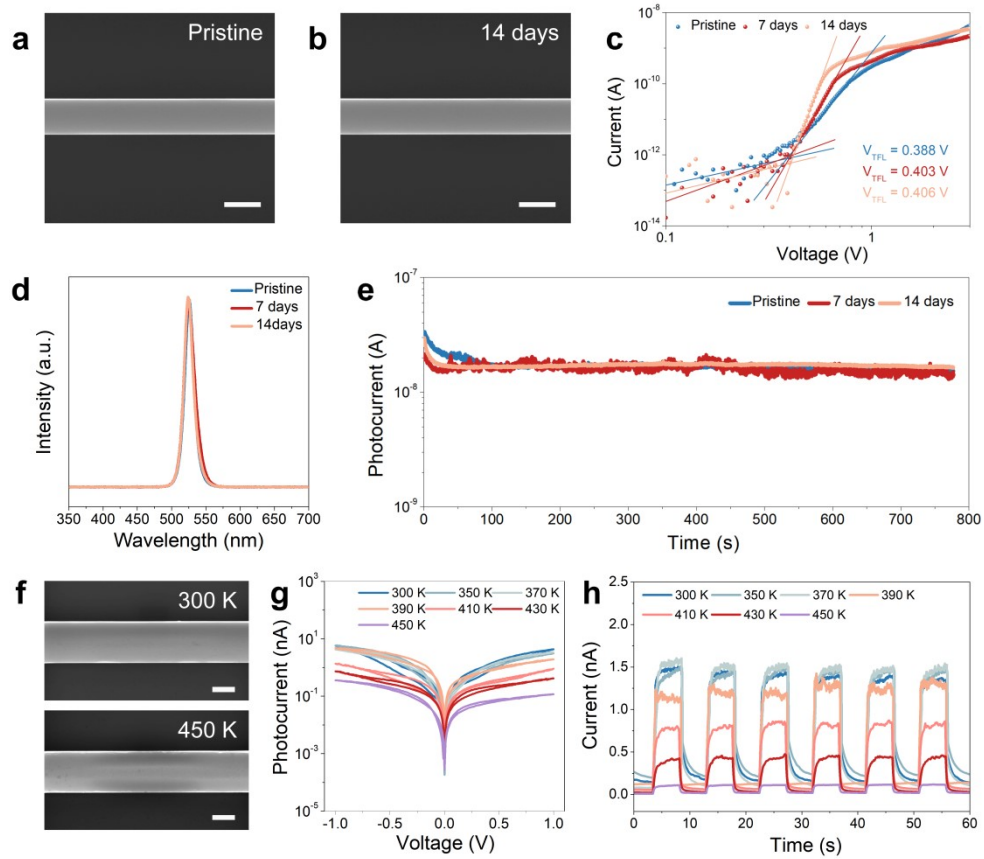

**Figure S8.** (a,b) SEM images of the CsPbBr<sub>3</sub> NW measured at the initial state and after 14 days of storage, respectively. Scale bar: 500 nm. (c) Space-charge-limited current characteristics of the NW measured initially, after 7 days, and after 14 days. (d) PL spectra of NW measured initially, after 7 days, and after 14 days. (e) Photocurrent stability of the NW measured initially, after 7 days, and after 14 days. (f) SEM images of the CsPbBr<sub>3</sub> NW measured at 300 K and 450 K. Scale bar: 500 nm. (g,h) Temperature-dependent I-V and I-T characteristics of the CsPbBr<sub>3</sub> NW measured from 300 K to 450 K.

### Calculation of injected carrier density:

The average photogenerated carrier density under high irradiance was estimated using<sup>3-5</sup>:

$$\Delta n_{ph} = \frac{\eta_{abs} P \tau_{eff}}{h \nu t}$$

where  $P$  is the incident irradiance,  $\eta_{abs}$  is the absorption efficiency,  $\tau_{eff}$  is the effective carrier lifetime,  $h \nu$  is the photon energy, and  $t$  is the effective absorption thickness. The  $P$  is  $56.8 \text{ W cm}^{-2}$ ,  $\tau_{eff}$  is  $57 \text{ ns}$ ,  $t$  is  $300 \text{ nm}$ , the photogenerated carrier density is estimated to be  $2.22 \cdot \eta_{abs} \times 10^{17} \text{ cm}^{-3}$ . For moderate-to-strong absorption, this value is comparable to the effective hole concentration extracted from the transfer characteristic.

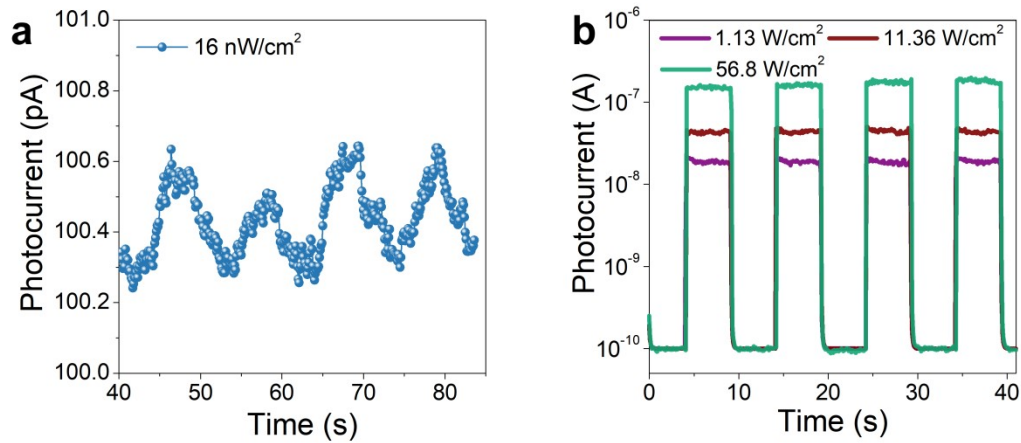

**Figure S9.** (a) I-T response of the CsPbBr<sub>3</sub> PD under  $16 \text{ nW cm}^{-2}$  light illumination. (b) I-T response of the device under strong light illumination. The device maintains a clear photoresponse under illumination intensity up to  $56.8 \text{ W cm}^{-2}$ .

## Reference

1. M. D. Cortinhal, A. I. B. Rovisco and P. M. C. Barquinha, *Advanced Materials Technologies*, 2025, 10, e00735.
2. R. Graham, C. Miller, E. Oh and D. Yu, *Nano Letters*, 2011, 11, 717-722.
3. Y. Chen, H. T. Yi, X. Wu, R. Haroldson, Y. N. Gartstein, Y. I. Rodionov, K. S. Tikhonov, A. Zakhidov, X. Y. Zhu and V. Podzorov, *Nature Communications*, 2016, 7, 12253.
4. N. Vagenas, V. Podzorov and P. Kounavis, *Physical Review Materials*, 2021, 5, 063801.
5. H. Fang and W. Hu, *Advanced Science*, 2017, 4, 1700323.
